# Supplementary material
Source: publisher figshare collection journal article supplement (https://gsajournals.figshare.com/ndownloader/files/21399354)
Supplement: Supplementary file 1 [file 21399354]

## Sheet: Tillering Traits '14-'15
	Df	Sum Sq	Mean Sq	F value	Pr(>F)
Year	1	905.543	905.543	1917.05	2.11716e-209
Line	755	548.448	0.726421	1.53785	1.95033e-09
Residuals	755	356.634	0.472362	NA	NA
Genetic Variance:	0.127029	NA	NA	NA	NA
Heritability (H2):	0.34974	NA	NA	NA	NA
Trait/Lines:	Tiller Number 2WPE All Lines	NA	NA	NA	NA
	Df	Sum Sq	Mean Sq	F value	Pr(>F)
Year	1	435.513	435.513	763.033	2.50424e-92
Line	374	258.662	0.691611	1.21172	0.0318471
Residuals	374	213.467	0.570766	NA	NA
Genetic Variance:	0.0604224	NA	NA	NA	NA
Heritability (H2):	NA - Genetic variance not significant	NA	NA	NA	NA
Trait/Lines:	Tiller Number 2WPE 2-Row Lines	NA	NA	NA	NA
	Df	Sum Sq	Mean Sq	F value	Pr(>F)
Year	1	470.239	470.239	1249.96	3.26976e-122
Line	380	188.317	0.495571	1.31729	0.003681
Residuals	380	142.958	0.376204	NA	NA
Genetic Variance:	0.0596833	NA	NA	NA	NA
Heritability (H2):	NA - Genetic variance not significant	NA	NA	NA	NA
Trait/Lines:	Tiller Number 2WPE 6-Row Lines	NA	NA	NA	NA
	Df	Sum Sq	Mean Sq	F value	Pr(>F)
Year	1	428.757	428.757	1086.18	2.40613e-105
Line	323	195.077	0.603953	1.53001	7.10861e-05
Residuals	323	127.501	0.394739	NA	NA
Genetic Variance:	0.104607	NA	NA	NA	NA
Heritability (H2):	0.346409	NA	NA	NA	NA
Trait/Lines:	Tiller Number 2WPE Ppd-H1 Lines	NA	NA	NA	NA
	Df	Sum Sq	Mean Sq	F value	Pr(>F)
Year	1	478.559	478.559	907.189	4.3024e-108
Line	431	330.775	0.767459	1.45485	5.26534e-05
Residuals	431	227.36	0.527518	NA	NA
Genetic Variance:	0.11997	NA	NA	NA	NA
Heritability (H2):	0.312643	NA	NA	NA	NA
Trait/Lines:	Tiller Number 2WPE ppd-H1 Lines	NA	NA	NA	NA
	Df	Sum Sq	Mean Sq	F value	Pr(>F)
Year	1	8046.95	8046.95	2511.8	2.31002e-242
Line	755	3444.48	4.56223	1.42407	6.40483e-07
Residuals	755	2418.76	3.20366	NA	NA
Genetic Variance:	0.679284	NA	NA	NA	NA
Heritability (H2):	0.297786	NA	NA	NA	NA
Trait/Lines:	Tiller Number 3WPE All Lines	NA	NA	NA	NA
	Df	Sum Sq	Mean Sq	F value	Pr(>F)
Year	1	5655.72	5655.72	1631.01	1.95511e-138
Line	374	1432.83	3.83109	1.10482	0.167774
Residuals	374	1296.89	3.46763	NA	NA
Genetic Variance:	0.18173	NA	NA	NA	NA
Heritability (H2):	NA - Genetic variance not significant	NA	NA	NA	NA
Trait/Lines:	Tiller Number 3WPE 2-Row Lines	NA	NA	NA	NA
	Df	Sum Sq	Mean Sq	F value	Pr(>F)
Year	1	2678.19	2678.19	1218.95	1.25996e-120
Line	380	991.923	2.61032	1.18806	0.0467247
Residuals	380	834.907	2.19712	NA	NA
Genetic Variance:	0.2066	NA	NA	NA	NA
Heritability (H2):	NA - Genetic variance not significant	NA	NA	NA	NA
Trait/Lines:	Tiller Number 3WPE 6-Row Lines	NA	NA	NA	NA
	Df	Sum Sq	Mean Sq	F value	Pr(>F)
Year	1	3100.43	3100.43	1226.86	5.02874e-112
Line	323	1170.39	3.62349	1.43383	0.000625542
Residuals	323	816.263	2.52713	NA	NA
Genetic Variance:	0.548178	NA	NA	NA	NA
Heritability (H2):	0.302569	NA	NA	NA	NA
Trait/Lines:	Tiller Number 3WPE Ppd-H1 Lines	NA	NA	NA	NA
	Df	Sum Sq	Mean Sq	F value	Pr(>F)
Year	1	4962.73	4962.73	1348.39	8.72169e-135
Line	431	2049.91	4.75616	1.29227	0.00394993
Residuals	431	1586.29	3.68048	NA	NA
Genetic Variance:	0.537843	NA	NA	NA	NA
Heritability (H2):	NA - Genetic variance not significant	NA	NA	NA	NA
Trait/Lines:	Tiller Number 3WPE ppd-H1 Lines	NA	NA	NA	NA
	Df	Sum Sq	Mean Sq	F value	Pr(>F)
Year	1	20263.8	20263.8	2884.42	4.45111e-260
Line	755	8492.27	11.248	1.60108	6.17696e-11
Residuals	755	5304.07	7.02526	NA	NA
Genetic Variance:	2.11139	NA	NA	NA	NA
Heritability (H2):	0.375424	NA	NA	NA	NA
Trait/Lines:	Tiller Number 4WPE All Lines	NA	NA	NA	NA
	Df	Sum Sq	Mean Sq	F value	Pr(>F)
Year	1	12138.3	12138.3	1688.62	9.75065e-141
Line	374	3710.65	9.92153	1.38023	0.000944201
Residuals	374	2688.43	7.18831	NA	NA
Genetic Variance:	1.36661	NA	NA	NA	NA
Heritability (H2):	0.275484	NA	NA	NA	NA
Trait/Lines:	Tiller Number 4WPE 2-Row Lines	NA	NA	NA	NA
	Df	Sum Sq	Mean Sq	F value	Pr(>F)
Year	1	8320.64	8320.64	1306.27	5.12199e-125
Line	380	3867.82	10.1785	1.59794	2.74877e-06
Residuals	380	2420.5	6.36975	NA	NA
Genetic Variance:	1.90437	NA	NA	NA	NA
Heritability (H2):	0.374195	NA	NA	NA	NA
Trait/Lines:	Tiller Number 4WPE 6-Row Lines	NA	NA	NA	NA
Df	Sum Sq	Mean Sq	F value	Pr(>F)
Year	1	8465.61	8465.61	1378.09	1.46557e-118
Line	323	3546.74	10.9806	1.78751	1.11336e-07
Residuals	323	1984.18	6.14298	NA	NA
Genetic Variance:	2.41882	NA	NA	NA	NA
Heritability (H2):	0.440562	NA	NA	NA	NA
Trait/Lines:	Tiller Number 4WPE Ppd-H1 Lines	NA	NA	NA	NA
	Df	Sum Sq	Mean Sq	F value	Pr(>F)
Year	1	11800.6	11800.6	1533.13	4.89289e-144
Line	431	4619.69	10.7185	1.39254	0.000304639
Residuals	431	3317.45	7.69709	NA	NA
Genetic Variance:	1.51072	NA	NA	NA	NA
Heritability (H2):	0.28189	NA	NA	NA	NA
Trait/Lines:	Tiller Number 4WPE ppd-H1 Lines	NA	NA	NA	NA
	Df	Sum Sq	Mean Sq	F value	Pr(>F)
Year	1	55906.8	55906.8	3253.73	6.28183e-276
Line	755	23481.7	31.1015	1.81008	2.96352e-16
Residuals	755	12972.7	17.1824	NA	NA
Genetic Variance:	6.95956	NA	NA	NA	NA
Heritability (H2):	0.447538	NA	NA	NA	NA
Trait/Lines:	Tiller Number 5WPE All Lines	NA	NA	NA	NA
	Df	Sum Sq	Mean Sq	F value	Pr(>F)
Year	1	36638.6	36638.6	2243.79	4.18463e-160
Line	374	9625.62	25.737	1.57616	5.99182e-06
Residuals	374	6107.01	16.3289	NA	NA
Genetic Variance:	4.70403	NA	NA	NA	NA
Heritability (H2):	0.365547	NA	NA	NA	NA
Trait/Lines:	Tiller Number 5WPE 2-Row Lines	NA	NA	NA	NA
	Df	Sum Sq	Mean Sq	F value	Pr(>F)
Year	1	20496.9	20496.9	1381.73	1.2433e-128
Line	380	11194.1	29.4581	1.98582	1.81535e-11
Residuals	380	5637	14.8342	NA	NA
Genetic Variance:	7.31192	NA	NA	NA	NA
Heritability (H2):	0.49643	NA	NA	NA	NA
Trait/Lines:	Tiller Number 5WPE 6-Row Lines	NA	NA	NA	NA
	Df	Sum Sq	Mean Sq	F value	Pr(>F)
Year	1	20893.3	20893.3	1423.34	2.10629e-120
Line	323	9951.85	30.8107	2.09895	2.29641e-11
Residuals	323	4741.34	14.6791	NA	NA
Genetic Variance:	8.06581	NA	NA	NA	NA
Heritability (H2):	0.523572	NA	NA	NA	NA
Trait/Lines:	Tiller Number 5WPE Ppd-H1 Lines	NA	NA	NA	NA
	Df	Sum Sq	Mean Sq	F value	Pr(>F)
Year	1	35197.2	35197.2	1885.01	1.80761e-159
Line	431	12122.6	28.1268	1.50635	1.14016e-05
Residuals	431	8047.68	18.6721	NA	NA
Genetic Variance:	4.72732	NA	NA	NA	NA
Heritability (H2):	0.336144	NA	NA	NA	NA
Trait/Lines:	Tiller Number 5WPE ppd-H1 Lines	NA	NA	NA	NA
	Df	Sum Sq	Mean Sq	F value	Pr(>F)
Year	1	61509.3	61509.3	3433.8	3.90774e-283
Line	755	28837.3	38.1952	2.13227	4.38324e-25
Residuals	755	13524.2	17.9129	NA	NA
Genetic Variance:	10.1411	NA	NA	NA	NA
Heritability (H2):	0.531017	NA	NA	NA	NA
Trait/Lines:	Tiller Number 6WPE All Lines	NA	NA	NA	NA
	Df	Sum Sq	Mean Sq	F value	Pr(>F)
Year	1	39289.5	39289.5	2230.02	1.12289e-159
Line	374	11557.9	30.9034	1.75403	3.43052e-08
Residuals	374	6589.31	17.6185	NA	NA
Genetic Variance:	6.64244	NA	NA	NA	NA
Heritability (H2):	0.429885	NA	NA	NA	NA
Trait/Lines:	Tiller Number 6WPE 2-Row Lines	NA	NA	NA	NA
	Df	Sum Sq	Mean Sq	F value	Pr(>F)
Year	1	23319.7	23319.7	1518.65	8.21334e-135
Line	380	13291.9	34.9786	2.27791	1.28894e-15
Residuals	380	5835.12	15.3556	NA	NA
Genetic Variance:	9.8115	NA	NA	NA	NA
Heritability (H2):	0.561	NA	NA	NA	NA
Trait/Lines:	Tiller Number 6WPE 6-Row Lines	NA	NA	NA	NA
	Df	Sum Sq	Mean Sq	F value	Pr(>F)
Year	1	23543.1	23543.1	1599.97	3.64213e-127
Line	323	11436.8	35.408	2.4063	4.14141e-15
Residuals	323	4752.85	14.7147	NA	NA
Genetic Variance:	10.3467	NA	NA	NA	NA
Heritability (H2):	0.584425	NA	NA	NA	NA
Trait/Lines:	Tiller Number 6WPE Ppd-H1 Lines	NA	NA	NA	NA
	Df	Sum Sq	Mean Sq	F value	Pr(>F)
Year	1	38105.6	38105.6	1902.63	3.52928e-160
Line	431	15173.6	35.2055	1.75782	3.0541e-09
Residuals	431	8632.03	20.0279	NA	NA
Genetic Variance:	7.58879	NA	NA	NA	NA
Heritability (H2):	0.431114	NA	NA	NA	NA
Trait/Lines:	Tiller Number 6WPE ppd-H1 Lines	NA	NA	NA	NA
	Df	Sum Sq	Mean Sq	F value	Pr(>F)
Year	1	56814.6	56814.6	3209.56	4.12078e-274
Line	755	27213.9	36.0449	2.03624	2.09509e-22
Residuals	755	13364.8	17.7017	NA	NA
Genetic Variance:	9.1716	NA	NA	NA	NA
Heritability (H2):	0.508899	NA	NA	NA	NA
Trait/Lines:	Tiller Number 7WPE All Lines	NA	NA	NA	NA
	Df	Sum Sq	Mean Sq	F value	Pr(>F)
Year	1	38676.4	38676.4	2120.84	3.39182e-156
Line	374	11041.9	29.5238	1.61895	1.7998e-06
Residuals	374	6820.41	18.2364	NA	NA
Genetic Variance:	5.64371	NA	NA	NA	NA
Heritability (H2):	0.382316	NA	NA	NA	NA
Trait/Lines:	Tiller Number 7WPE 2-Row Lines	NA	NA	NA	NA
	Df	Sum Sq	Mean Sq	F value	Pr(>F)
Year	1	19782.7	19782.7	1534.22	1.73749e-135
Line	380	11005	28.9605	2.24599	3.69092e-15
Residuals	380	4899.84	12.8943	NA	NA
Genetic Variance:	8.0331	NA	NA	NA	NA
Heritability (H2):	0.554763	NA	NA	NA	NA
Trait/Lines:	Tiller Number 7WPE 6-Row Lines	NA	NA	NA	NA
	Df	Sum Sq	Mean Sq	F value	Pr(>F)
Year	1	21522.1	21522.1	1556.47	1.47e-125
Line	323	9605.51	29.7384	2.15066	5.4255e-12
Residuals	323	4466.3	13.8276	NA	NA
Genetic Variance:	7.95543	NA	NA	NA	NA
Heritability (H2):	0.535027	NA	NA	NA	NA
Trait/Lines:	Tiller Number 7WPE Ppd-H1 Lines	NA	NA	NA	NA
	Df	Sum Sq	Mean Sq	F value	Pr(>F)
Year	1	35445	35445	1746.74	1.05065e-153
Line	431	15098.9	35.0322	1.7264	9.00288e-09
Residuals	431	8745.87	20.292	NA	NA
Genetic Variance:	7.37006	NA	NA	NA	NA
Heritability (H2):	0.42076	NA	NA	NA	NA
Trait/Lines:	Tiller Number 7WPE ppd-H1 Lines	NA	NA	NA	NA
	Df	Sum Sq	Mean Sq	F value	Pr(>F)
Year	1	62803.7	62803.7	3201.35	9.01111e-274
Line	755	29903.5	39.6073	2.01894	6.31966e-22
Residuals	755	14811.5	19.6179	NA	NA
Genetic Variance:	9.99473	NA	NA	NA	NA
Heritability (H2):	0.504691	NA	NA	NA	NA
Trait/Lines:	Tiller Number Maximum All Lines	NA	NA	NA	NA
	Df	Sum Sq	Mean Sq	F value	Pr(>F)
Year	1	40757.7	40757.7	2129.52	1.77069e-156
Line	374	11689	31.2539	1.63296	1.20667e-06
Residuals	374	7158.14	19.1394	NA	NA
Genetic Variance:	6.05726	NA	NA	NA	NA
Heritability (H2):	0.387616	NA	NA	NA	NA
Trait/Lines:	Tiller Number Maximum 2-Row Lines	NA	NA	NA	NA
	Df	Sum Sq	Mean Sq	F value	Pr(>F)
Year	1	23324.5	23324.5	1390.38	4.90053e-129
Line	380	14353.6	37.7725	2.25162	3.06587e-15
Residuals	380	6374.76	16.7757	NA	NA
Genetic Variance:	10.4984	NA	NA	NA	NA
Heritability (H2):	0.555876	NA	NA	NA	NA
Trait/Lines:	Tiller Number Maximum 6-Row Lines	NA	NA	NA	NA
	Df	Sum Sq	Mean Sq	F value	Pr(>F)
Year	1	24681	24681	1477	1.58184e-122
Line	323	12544.1	38.8364	2.32412	4.17645e-14
Residuals	323	5397.38	16.7102	NA	NA
Genetic Variance:	11.0631	NA	NA	NA	NA
Heritability (H2):	0.569729	NA	NA	NA	NA
Trait/Lines:	Tiller Number Maximum Ppd-H1 Lines	NA	NA	NA	NA
	Df	Sum Sq	Mean Sq	F value	Pr(>F)
Year	1	38207.4	38207.4	1765.12	1.717e-154
Line	431	15330.2	35.569	1.64323	1.47677e-07
Residuals	431	9329.36	21.6458	NA	NA
Genetic Variance:	6.96159	NA	NA	NA	NA
Heritability (H2):	0.391441	NA	NA	NA	NA
Trait/Lines:	Tiller Number Maximum ppd-H1 Lines	NA	NA	NA	NA
	Df	Sum Sq	Mean Sq	F value	Pr(>F)
Year	1	18359.3	18359.3	1749.36	1.88184e-197
Line	743	13208.1	17.7767	1.69385	4.69343e-13
Residuals	743	7797.69	10.4949	NA	NA
Genetic Variance:	3.64092	NA	NA	NA	NA
Heritability (H2):	0.409628	NA	NA	NA	NA
Trait/Lines:	Tiller Number Productive All Lines	NA	NA	NA	NA
	Df	Sum Sq	Mean Sq	F value	Pr(>F)
Year	1	13339.1	13339.1	1148.83	1.18301e-115
Line	371	5661.23	15.2594	1.31422	0.00432347
Residuals	371	4307.66	11.611	NA	NA
Genetic Variance:	1.82422	NA	NA	NA	NA
Heritability (H2):	NA - Genetic variance not significant	NA	NA	NA	NA
Trait/Lines:	Tiller Number Productive 2-Row Lines	NA	NA	NA	NA
	Df	Sum Sq	Mean Sq	F value	Pr(>F)
Year	1	5795.17	5795.17	791.878	4.59348e-94
Line	371	4001.52	10.7858	1.47381	9.91431e-05
Residuals	371	2715.07	7.31826	NA	NA
Genetic Variance:	1.73375	NA	NA	NA	NA
Heritability (H2):	0.321489	NA	NA	NA	NA
Trait/Lines:	Tiller Number Productive 6-Row Lines	NA	NA	NA	NA
	Df	Sum Sq	Mean Sq	F value	Pr(>F)
Year	1	7822.2	7822.2	1131.78	5.62852e-106
Line	313	3335.94	10.6579	1.54207	6.84911e-05
Residuals	313	2163.28	6.91144	NA	NA
Genetic Variance:	1.87325	NA	NA	NA	NA
Heritability (H2):	0.351523	NA	NA	NA	NA
Trait/Lines:	Tiller Number Productive Ppd-H1 Lines	NA	NA	NA	NA
	Df	Sum Sq	Mean Sq	F value	Pr(>F)
Year	1	10537.4	10537.4	802.352	2.83826e-100
Line	429	8289.84	19.3236	1.47137	3.37658e-05
Residuals	429	5634.11	13.1331	NA	NA
Genetic Variance:	3.09525	NA	NA	NA	NA
Heritability (H2):	0.32036	NA	NA	NA	NA
Trait/Lines:	Tiller Number Productive ppd-H1 Lines	NA	NA	NA	NA
	Df	Sum Sq	Mean Sq	F value	Pr(>F)
Year	1	1739.45	1739.45	2607.48	1.6992e-248
Line	760	877.022	1.15398	1.72983	2.80753e-14
Residuals	764	509.666	0.667102	NA	NA
Genetic Variance:	0.243437	NA	NA	NA	NA
Heritability (H2):	0.42191	NA	NA	NA	NA
Trait/Lines:	Tillering Rate All Lines	NA	NA	NA	NA
	Df	Sum Sq	Mean Sq	F value	Pr(>F)
Year	1	1120.49	1120.49	1710	1.06218e-143
Line	381	372.982	0.978956	1.494	4.53523e-05
Residuals	385	252.274	0.655258	NA	NA
Genetic Variance:	0.161849	NA	NA	NA	NA
Heritability (H2):	0.330656	NA	NA	NA	NA
Trait/Lines:	Tillering Rate 2-Row Lines	NA	NA	NA	NA
	Df	Sum Sq	Mean Sq	F value	Pr(>F)
Year	1	650.859	650.859	1082.93	5.11078e-113
Line	378	440.797	1.16613	1.94026	8.76006e-11
Residuals	378	227.184	0.601016	NA	NA
Genetic Variance:	0.282557	NA	NA	NA	NA
Heritability (H2):	0.484606	NA	NA	NA	NA
Trait/Lines:	Tillering Rate 6-Row Lines	NA	NA	NA	NA
Df	Sum Sq	Mean Sq	F value	Pr(>F)
Year	1	669.837	669.837	1015.04	7.47638e-102
Line	324	406.914	1.25591	1.90315	4.77982e-09
Residuals	324	213.811	0.659911	NA	NA
Genetic Variance:	0.297999	NA	NA	NA	NA
Heritability (H2):	0.474555	NA	NA	NA	NA
Trait/Lines:	Tillering Rate Ppd-H1 Lines	NA	NA	NA	NA
	Df	Sum Sq	Mean Sq	F value	Pr(>F)
Year	1	1073.91	1073.91	1610.83	5.3865e-149
Line	435	433.804	0.997251	1.49585	1.37046e-05
Residuals	439	292.671	0.666678	NA	NA
Genetic Variance:	0.165287	NA	NA	NA	NA
Heritability (H2):	0.331485	NA	NA	NA	NA
Trait/Lines:	Tillering Rate ppd-H1 Lines	NA	NA	NA	NA
	Df	Sum Sq	Mean Sq	F value	Pr(>F)
Year	1	26.2598	26.2598	37.2019	1.69086e-09
Line	760	599.228	0.788458	1.117	0.0634548
Residuals	764	539.285	0.705871	NA	NA
Genetic Variance:	0.0412934	NA	NA	NA	NA
Heritability (H2):	NA - Genetic variance not significant	NA	NA	NA	NA
Trait/Lines:	Tillering Duration (Weeks) All Lines	NA	NA	NA	NA
	Df	Sum Sq	Mean Sq	F value	Pr(>F)
Year	1	7.96052	7.96052	11.3964	0.000810743
Line	381	264.759	0.694905	0.99484	0.520104
Residuals	385	268.926	0.698509	NA	NA
Genetic Variance:	-0.00180227	NA	NA	NA	NA
Heritability (H2):	NA - Genetic variance not significant	NA	NA	NA	NA
Trait/Lines:	Tillering Duration (Weeks) 2-Row Lines	NA	NA	NA	NA
Df	Sum Sq	Mean Sq	F value	Pr(>F)
Year	1	19.8656	19.8656	27.9206	2.14017e-07
Line	378	284.207	0.75187	1.05674	0.295952
Residuals	378	268.948	0.711501	NA	NA
Genetic Variance:	0.0201842	NA	NA	NA	NA
Heritability (H2):	0.0536908	NA	NA	NA	NA
Trait/Lines:	Tillering Duration (Weeks) 6-Row Lines	NA	NA	NA	NA
	Df	Sum Sq	Mean Sq	F value	Pr(>F)
Year	1	39.1879	39.1879	50.3262	8.23437e-12
Line	324	229.756	0.709123	0.910674	0.799917
Residuals	324	252.292	0.778679	NA	NA
Genetic Variance:	-0.034778	NA	NA	NA	NA
Heritability (H2):	NA - Genetic variance not significant	NA	NA	NA	NA
Trait/Lines:	Tillering Duration (Weeks) Ppd-H1 Lines	NA	NA	NA	NA
	Df	Sum Sq	Mean Sq	F value	Pr(>F)
Year	1	1.92104	1.92104	3.09826	0.0790725
Line	435	344.355	0.79162	1.27673	0.00539419
Residuals	439	272.197	0.620038	NA	NA
Genetic Variance:	0.0857914	NA	NA	NA	NA
Heritability (H2):	NA - Genetic variance not significant	NA	NA	NA	NA
Trait/Lines:	Tillering Duration (Weeks) ppd-H1 Lines	NA	NA	NA	NA
	Df	Sum Sq	Mean Sq	F value	Pr(>F)
Year	1	43960.7	43960.7	183.553	1.41662e-37
Line	748	188918	252.565	1.05455	0.233573
Residuals	752	180103	239.499	NA	NA
Genetic Variance:	6.53272	NA	NA	NA	NA
Heritability (H2):	NA - Genetic variance not significant	NA	NA	NA	NA
Trait/Lines:	Percent Productive Tillers All Lines	NA	NA	NA	NA
	Df	Sum Sq	Mean Sq	F value	Pr(>F)
Year	1	28473.2	28473.2	146.874	8.13306e-29
Line	377	78251.6	207.564	1.07068	0.25318
Residuals	381	73861.1	193.861	NA	NA
Genetic Variance:	6.85145	NA	NA	NA	NA
Heritability (H2):	0.0660177	NA	NA	NA	NA
Trait/Lines:	Percent Productive Tillers 2-Row Lines	NA	NA	NA	NA
	Df	Sum Sq	Mean Sq	F value	Pr(>F)
Year	1	16156.2	16156.2	56.6935	3.92996e-13
Line	370	97712.6	264.088	0.92671	0.767753
Residuals	370	105440	284.974	NA	NA
Genetic Variance:	-10.4429	NA	NA	NA	NA
Heritability (H2):	NA - Genetic variance not significant	NA	NA	NA	NA
Trait/Lines:	Percent Productive Tillers 6-Row Lines	NA	NA	NA	NA
	Df	Sum Sq	Mean Sq	F value	Pr(>F)
Year	1	7191.89	7191.89	30.6464	6.54347e-08
Line	314	82847.8	263.847	1.12431	0.149859
Residuals	314	73687.4	234.673	NA	NA
Genetic Variance:	14.5866	NA	NA	NA	NA
Heritability (H2):	NA - Genetic variance not significant	NA	NA	NA	NA
Trait/Lines:	Percent Productive Tillers Ppd-H1 Lines	NA	NA	NA	NA
	Df	Sum Sq	Mean Sq	F value	Pr(>F)
Year	1	41192	41192	176.558	4.44858e-34
Line	433	104041	240.278	1.02989	0.379385
Residuals	437	101954	233.305	NA	NA
Genetic Variance:	3.48665	NA	NA	NA	NA
Heritability (H2):	NA - Genetic variance not significant	NA	NA	NA	NA
Trait/Lines:	Percent Productive Tillers ppd-H1 Lines	NA	NA	NA	NA

## Sheet: Non-Tillering Traits '14-'15
Table S5. Two-Way ANOVA and Heritability Estimates for All Traits
	Df	Sum Sq	Mean Sq	F value	Pr(>F)
Year	1	1089.01	1089.01	39.1916	6.41116e-10
Line	758	119166	157.211	5.65777	1.68975e-113
Residuals	762	21173.5	27.7867	NA	NA
Genetic Variance:	64.7121	NA	NA	NA	NA
Heritability (H2):	0.823252	NA	NA	NA	NA
Trait/Lines:	Days to Heading All Lines	NA	NA	NA	NA
	Df	Sum Sq	Mean Sq	F value	Pr(>F)
Year	1	1597.52	1597.52	50.2745	6.43735e-12
Line	381	55369.9	145.328	4.57352	2.29863e-46
Residuals	385	12233.7	31.7759	NA	NA
Genetic Variance:	56.7759	NA	NA	NA	NA
Heritability (H2):	0.78135	NA	NA	NA	NA
Trait/Lines:	Days to Heading 2-Row Lines	NA	NA	NA	NA
	Df	Sum Sq	Mean Sq	F value	Pr(>F)
Year	1	40.9949	40.9949	1.82899	0.17706
Line	376	62229.2	165.503	7.38391	4.36251e-73
Residuals	376	8427.67	22.414	NA	NA
Genetic Variance:	71.5445	NA	NA	NA	NA
Heritability (H2):	0.86457	NA	NA	NA	NA
Trait/Lines:	Days to Heading 6-Row Lines	NA	NA	NA	NA
	Df	Sum Sq	Mean Sq	F value	Pr(>F)
Year	1	135.262	135.262	7.66019	0.00597189
Line	322	53447	165.985	9.40006	3.62105e-76
Residuals	322	5685.82	17.6578	NA	NA
Genetic Variance:	74.1634	NA	NA	NA	NA
Heritability (H2):	0.893618	NA	NA	NA	NA
Trait/Lines:	Days to Heading Ppd-H1 Lines	NA	NA	NA	NA
	Df	Sum Sq	Mean Sq	F value	Pr(>F)
Year	1	2824.67	2824.67	90.7859	1.09594e-19
Line	435	52741.4	121.245	3.89685	3.6028e-43
Residuals	439	13658.8	31.1135	NA	NA
Genetic Variance:	45.0656	NA	NA	NA	NA
Heritability (H2):	0.743382	NA	NA	NA	NA
Trait/Lines:	Days to Heading ppd-H1 Lines	NA	NA	NA	NA
	Df	Sum Sq	Mean Sq	F value	Pr(>F)
Year	1	59784.7	59784.7	965.994	1.80858e-136
Line	738	267405	362.338	5.85461	1.87047e-114
Residuals	742	45921.9	61.8893	NA	NA
Genetic Variance:	150.224	NA	NA	NA	NA
Heritability (H2):	0.829195	NA	NA	NA	NA
Trait/Lines:	Seeds Per Spike All Lines	NA	NA	NA	NA
	Df	Sum Sq	Mean Sq	F value	Pr(>F)
Year	1	9786.75	9786.75	643.26	2.82686e-83
Line	370	16807.6	45.426	2.98574	3.35038e-25
Residuals	374	5690.15	15.2143	NA	NA
Genetic Variance:	15.1058	NA	NA	NA	NA
Heritability (H2):	0.665075	NA	NA	NA	NA
Trait/Lines:	Seeds Per Spike 2-Row Lines	NA	NA	NA	NA
	Df	Sum Sq	Mean Sq	F value	Pr(>F)
Year	1	60398	60398	755.615	4.01403e-91
Line	367	73568.5	200.459	2.50786	2.50917e-18
Residuals	367	29335.2	79.9323	NA	NA
Genetic Variance:	60.2635	NA	NA	NA	NA
Heritability (H2):	0.601254	NA	NA	NA	NA
Trait/Lines:	Seeds Per Spike 6-Row Lines	NA	NA	NA	NA
	Df	Sum Sq	Mean Sq	F value	Pr(>F)
Year	1	32593.5	32593.5	505.32	1.6367e-67
Line	316	101781	322.092	4.99362	1.78118e-42
Residuals	316	20382.2	64.5008	NA	NA
Genetic Variance:	128.796	NA	NA	NA	NA
Heritability (H2):	0.799744	NA	NA	NA	NA
Trait/Lines:	Seeds Per Spike Ppd-H1 Lines	NA	NA	NA	NA
	Df	Sum Sq	Mean Sq	F value	Pr(>F)
Year	1	27840	27840	477.883	1.53354e-71
Line	421	157455	374.002	6.41988	1.58244e-72
Residuals	425	24759.2	58.2569	NA	NA
Genetic Variance:	157.873	NA	NA	NA	NA
Heritability (H2):	0.844234	NA	NA	NA	NA
Trait/Lines:	Seeds Per Spike ppd-H1 Lines	NA	NA	NA	NA
	Df	Sum Sq	Mean Sq	F value	Pr(>F)
Year	1	109.991	109.991	1884.54	2.66433e-204
Line	725	186.328	0.257004	4.40339	3.08927e-82
Residuals	729	42.5481	0.058365	NA	NA
Genetic Variance:	0.0993194	NA	NA	NA	NA
Heritability (H2):	0.772902	NA	NA	NA	NA
Trait/Lines:	Fifty Kernel Weight (g) All Lines	NA	NA	NA	NA
	Df	Sum Sq	Mean Sq	F value	Pr(>F)
Year	1	69.9508	69.9508	1084	1.85883e-111
Line	362	69.9211	0.193152	2.99321	8.42883e-25
Residuals	366	23.618	0.0645301	NA	NA
Genetic Variance:	0.064311	NA	NA	NA	NA
Heritability (H2):	0.665911	NA	NA	NA	NA
Trait/Lines:	Fifty Kernel Weight (g) 2-Row Lines	NA	NA	NA	NA
	Df	Sum Sq	Mean Sq	F value	Pr(>F)
Year	1	42.1383	42.1383	882.153	4.47228e-99
Line	362	71.7244	0.198134	4.14787	5.28298e-39
Residuals	362	17.2919	0.0477675	NA	NA
Genetic Variance:	0.0751831	NA	NA	NA	NA
Heritability (H2):	0.758913	NA	NA	NA	NA
Trait/Lines:	Fifty Kernel Weight (g) 6-Row Lines	NA	NA	NA	NA
	Df	Sum Sq	Mean Sq	F value	Pr(>F)
Year	1	41.466	41.466	691.853	7.54245e-81
Line	309	93.2882	0.301904	5.03721	5.71243e-42
Residuals	309	18.5198	0.0599347	NA	NA
Genetic Variance:	0.120984	NA	NA	NA	NA
Heritability (H2):	0.801478	NA	NA	NA	NA
Trait/Lines:	Fifty Kernel Weight (g) Ppd-H1 Lines	NA	NA	NA	NA
	Df	Sum Sq	Mean Sq	F value	Pr(>F)
Year	1	68.8782	68.8782	1214.92	6.85939e-126
Line	415	91.2427	0.219862	3.87809	4.98164e-41
Residuals	419	23.7545	0.0566934	NA	NA
Genetic Variance:	0.0815843	NA	NA	NA	NA
Heritability (H2):	0.742141	NA	NA	NA	NA
Trait/Lines:	Fifty Kernel Weight (g) ppd-H1 Lines	NA	NA	NA	NA
	Df	Sum Sq	Mean Sq	F value	Pr(>F)
Year8	1	531161	531161	7605.42	0
Line	732	176584	241.235	3.45412	5.01098e-60
Residuals	736	51402.1	69.8399	NA	NA
Genetic Variance:	85.6978	NA	NA	NA	NA
Heritability (H2):	0.710491	NA	NA	NA	NA
Trait/Lines:	Plant Height (cm) All Lines	NA	NA	NA	NA
	Df	Sum Sq	Mean Sq	F value	Pr(>F)
Year	1	287079	287079	4164.3	8.35125e-205
Line	370	80631.9	217.924	3.16116	1.42683e-27
Residuals	374	25782.9	68.9381	NA	NA
Genetic Variance:	74.493	NA	NA	NA	NA
Heritability (H2):	0.68366	NA	NA	NA	NA
Trait/Lines:	Plant Height (cm) 2-Row Lines	NA	NA	NA	NA
	Df	Sum Sq	Mean Sq	F value	Pr(>F)
Year	1	244705	244705	3520.77	2.84571e-188
Line	361	95622.9	264.883	3.81109	6.51935e-35
Residuals	361	25090.7	69.5032	NA	NA
Genetic Variance:	97.6901	NA	NA	NA	NA
Heritability (H2):	0.737608	NA	NA	NA	NA
Trait/Lines:	Plant Height (cm) 6-Row Lines	NA	NA	NA	NA
	Df	Sum Sq	Mean Sq	F value	Pr(>F)
Year	1	205685	205685	4206.27	1.26747e-181
Line	308	76561.3	248.576	5.08338	2.99099e-42
Residuals	308	15061.1	48.8997	NA	NA
Genetic Variance:	99.838	NA	NA	NA	NA
Heritability (H2):	0.80328	NA	NA	NA	NA
Trait/Lines:	Plant Height (cm) Ppd-H1 Lines	NA	NA	NA	NA
	Df	Sum Sq	Mean Sq	F value	Pr(>F)
Year	1	326560	326560	3901.36	7.08486e-217
Line	423	82341.9	194.662	2.32559	4.91784e-18
Residuals	427	35741.7	83.7043	NA	NA
Genetic Variance:	55.4787	NA	NA	NA	NA
Heritability (H2):	0.570001	NA	NA	NA	NA
Trait/Lines:	Plant Height (cm) ppd-H1 Lines	NA	NA	NA	NA
	Df	Sum Sq	Mean Sq	F value	Pr(>F)
Year	1	270.674	270.674	2257.34	1.02021e-211
Line	634	278.478	0.439239	3.66312	7.1473e-57
Residuals	638	76.5016	0.119908	NA	NA
Genetic Variance:	0.159665	NA	NA	NA	NA
Heritability (H2):	0.727009	NA	NA	NA	NA
Trait/Lines:	Stem Diameter (mm) All Lines	NA	NA	NA	NA
	Df	Sum Sq	Mean Sq	F value	Pr(>F)
Year	1	116.52	116.52	1166.31	2.17112e-109
Line	320	102.125	0.319139	3.19443	1.62998e-24
Residuals	324	32.3692	0.0999049	NA	NA
Genetic Variance:	0.109617	NA	NA	NA	NA
Heritability (H2):	0.686955	NA	NA	NA	NA
Trait/Lines:	Stem Diameter (mm) 2-Row Lines	NA	NA	NA	NA
	Df	Sum Sq	Mean Sq	F value	Pr(>F)
Year	1	155.106	155.106	1143.14	1.6505e-106
Line	313	127.854	0.408481	3.01052	9.47665e-22
Residuals	313	42.4693	0.135685	NA	NA
Genetic Variance:	0.136398	NA	NA	NA	NA
Heritability (H2):	0.667831	NA	NA	NA	NA
Trait/Lines:	Stem Diameter (mm) 6-Row Lines	NA	NA	NA	NA
	Df	Sum Sq	Mean Sq	F value	Pr(>F)
Year	1	142.523	142.523	1317.21	5.53707e-104
Line	261	128.662	0.492958	4.55596	5.18824e-32
Residuals	261	28.2404	0.108201	NA	NA
Genetic Variance:	0.192379	NA	NA	NA	NA
Heritability (H2):	0.780507	NA	NA	NA	NA
Trait/Lines:	Stem Diameter (mm) Ppd-H1 Lines	NA	NA	NA	NA
	Df	Sum Sq	Mean Sq	F value	Pr(>F)
Year	1	131.558	131.558	1101.03	9.28162e-114
Line	372	146.69	0.394329	3.3002	1.43244e-29
Residuals	376	44.9269	0.119486	NA	NA
Genetic Variance:	NA	NA	NA	NA	NA
Heritability (H2):	NA	NA	NA	NA	NA
Trait/Lines:	Stem Diameter (mm) ppd-H1 Lines	NA	NA	NA	NA

## Sheet: All Traits '16
	Df	Sum Sq	Mean Sq	F value	Pr(>F)
Rep	1	3.63611	3.63611	0.918773	0.339958
Line	53	956.379	18.0449	4.55959	1.42163e-11
Residuals	107	423.46	3.95757	NA	NA
Genetic Variance:	4.69577	NA	NA	NA	NA
Heritability (H2):	0.780682	NA	NA	NA	NA
Trait/Lines:	Tiller Number 3WPE All Lines	NA	NA	NA	NA
	Df	Sum Sq	Mean Sq	F value	Pr(>F)
Rep	1	5.58521	5.58521	0.876696	0.353355
Line	26	545.613	20.9851	3.29398	0.000116465
Residuals	53	337.65	6.37075	NA	NA
Genetic Variance:	4.87146	NA	NA	NA	NA
Heritability (H2):	0.696416	NA	NA	NA	NA
Trait/Lines:	Tiller Number 3WPE 2-Row Lines	NA	NA	NA	NA
	Df	Sum Sq	Mean Sq	F value	Pr(>F)
Rep	1	0.111157	0.111157	0.070344	0.791866
Line	26	282.262	10.8562	6.87017	1.7563e-09
Residuals	53	83.7505	1.5802	NA	NA
Genetic Variance:	3.09201	NA	NA	NA	NA
Heritability (H2):	0.854443	NA	NA	NA	NA
Trait/Lines:	Tiller Number 3WPE 6-Row Lines	NA	NA	NA	NA
	Df	Sum Sq	Mean Sq	F value	Pr(>F)
Rep	1	0.000869565	0.000869565	0.000535136	0.981646
Line	22	259.51	11.7959	7.25926	1.1535e-08
Residuals	45	73.1225	1.62494	NA	NA
Genetic Variance:	3.39032	NA	NA	NA	NA
Heritability (H2):	0.862245	NA	NA	NA	NA
Trait/Lines:	Tiller Number 3WPE Ppd-H1 Lines	NA	NA	NA	NA
	Df	Sum Sq	Mean Sq	F value	Pr(>F)
Rep	1	6.46237	6.46237	1.13437	0.291044
Line	30	644.995	21.4998	3.77396	5.44069e-06
Residuals	61	347.511	5.6969	NA	NA
Genetic Variance:	5.26765	NA	NA	NA	NA
Heritability (H2):	0.735026	NA	NA	NA	NA
Trait/Lines:	Tiller Number 3WPE ppd-H1 Lines	NA	NA	NA	NA
	Df	Sum Sq	Mean Sq	F value	Pr(>F)
Rep	1	33.5373	33.5373	2.47866	0.118353
Line	53	5833.08	110.058	8.13411	4.2459e-20
Residuals	107	1447.76	13.5304	NA	NA
Genetic Variance:	32.1759	NA	NA	NA	NA
Heritability (H2):	0.877061	NA	NA	NA	NA
Trait/Lines:	Tiller Number 5WPE All Lines	NA	NA	NA	NA
	Df	Sum Sq	Mean Sq	F value	Pr(>F)
Rep	1	52.9716	52.9716	2.53608	0.117218
Line	26	2886.78	111.03	5.3157	1.35638e-07
Residuals	53	1107.02	20.8872	NA	NA
Genetic Variance:	30.0476	NA	NA	NA	NA
Heritability (H2):	0.811878	NA	NA	NA	NA
Trait/Lines:	Tiller Number 5WPE 2-Row Lines	NA	NA	NA	NA
	Df	Sum Sq	Mean Sq	F value	Pr(>F)
Rep	1	0.831296	0.831296	0.137482	0.712275
Line	26	1649.76	63.4522	10.4939	5.30365e-13
Residuals	53	320.469	6.04658	NA	NA
Genetic Variance:	19.1352	NA	NA	NA	NA
Heritability (H2):	0.904707	NA	NA	NA	NA
Trait/Lines:	Tiller Number 5WPE 6-Row Lines	NA	NA	NA	NA
	Df	Sum Sq	Mean Sq	F value	Pr(>F)
Rep	1	0.50087	0.50087	0.0820896	0.7758
Line	22	1237.63	56.2561	9.22005	2.45134e-10
Residuals	45	274.567	6.1015	NA	NA
Genetic Variance:	16.7182	NA	NA	NA	NA
Heritability (H2):	0.891541	NA	NA	NA	NA
Trait/Lines:	Tiller Number 5WPE Ppd-H1 Lines	NA	NA	NA	NA
	Df	Sum Sq	Mean Sq	F value	Pr(>F)
Rep	1	49.4728	49.4728	2.60889	0.111427
Line	30	3636.67	121.222	6.39252	4.97769e-10
Residuals	61	1156.75	18.9632	NA	NA
Genetic Variance:	34.0864	NA	NA	NA	NA
Heritability (H2):	0.843567	NA	NA	NA	NA
Trait/Lines:	Tiller Number 5WPE ppd-H1 Lines	NA	NA	NA	NA
	Df	Sum Sq	Mean Sq	F value	Pr(>F)
Rep	1	114.049	114.049	8.87041	0.003586
Line	53	5531.81	104.374	8.11788	4.57983e-20
Residuals	107	1375.73	12.8573	NA	NA
Genetic Variance:	30.5055	NA	NA	NA	NA
Heritability (H2):	0.876815	NA	NA	NA	NA
Trait/Lines:	Tiller Number 6WPE All Lines	NA	NA	NA	NA
	Df	Sum Sq	Mean Sq	F value	Pr(>F)
Rep	1	94.6713	94.6713	4.55249	0.0375175
Line	26	2301.83	88.5318	4.25726	3.93051e-06
Residuals	53	1102.16	20.7955	NA	NA
Genetic Variance:	22.5788	NA	NA	NA	NA
Heritability (H2):	0.765107	NA	NA	NA	NA
Trait/Lines:	Tiller Number 6WPE 2-Row Lines	NA	NA	NA	NA
	Df	Sum Sq	Mean Sq	F value	Pr(>F)
Rep	1	28.8691	28.8691	5.79409	0.0195959
Line	26	1596.18	61.3914	12.3214	1.90308e-14
Residuals	53	264.073	4.98251	NA	NA
Genetic Variance:	18.803	NA	NA	NA	NA
Heritability (H2):	0.91884	NA	NA	NA	NA
Trait/Lines:	Tiller Number 6WPE 6-Row Lines	NA	NA	NA	NA
	Df	Sum Sq	Mean Sq	F value	Pr(>F)
Rep	1	38.4392	38.4392	7.60383	0.00838624
Line	22	556.532	25.2969	5.0041	2.45517e-06
Residuals	45	227.486	5.05524	NA	NA
Genetic Variance:	6.74723	NA	NA	NA	NA
Heritability (H2):	0.800164	NA	NA	NA	NA
Trait/Lines:	Tiller Number 6WPE Ppd-H1 Lines	NA	NA	NA	NA
	Df	Sum Sq	Mean Sq	F value	Pr(>F)
Rep	1	76.642	76.642	4.07525	0.0479177
Line	30	3736.01	124.534	6.62178	2.45507e-10
Residuals	61	1147.21	18.8067	NA	NA
Genetic Variance:	35.2423	NA	NA	NA	NA
Heritability (H2):	0.848983	NA	NA	NA	NA
Trait/Lines:	Tiller Number 6WPE ppd-H1 Lines	NA	NA	NA	NA
	Df	Sum Sq	Mean Sq	F value	Pr(>F)
Rep	1	3.38967	3.38967	0.316939	0.574631
Line	53	4477.48	84.4807	7.89905	1.28396e-19
Residuals	107	1144.37	10.695	NA	NA
Genetic Variance:	24.5952	NA	NA	NA	NA
Heritability (H2):	0.873403	NA	NA	NA	NA
Trait/Lines:	Tiller Number 7WPE All Lines	NA	NA	NA	NA
	Df	Sum Sq	Mean Sq	F value	Pr(>F)
Rep	1	4.19449	4.19449	0.251411	0.61816
Line	26	1601.45	61.5941	3.69186	2.76558e-05
Residuals	53	884.241	16.6838	NA	NA
Genetic Variance:	14.9701	NA	NA	NA	NA
Heritability (H2):	0.729134	NA	NA	NA	NA
Trait/Lines:	Tiller Number 7WPE 2-Row Lines	NA	NA	NA	NA
	Df	Sum Sq	Mean Sq	F value	Pr(>F)
Rep	1	0.308771	0.308771	0.063181	0.802509
Line	26	1736.35	66.7828	13.6652	2.08893e-15
Residuals	53	259.015	4.88708	NA	NA
Genetic Variance:	20.6319	NA	NA	NA	NA
Heritability (H2):	0.926821	NA	NA	NA	NA
Trait/Lines:	Tiller Number 7WPE 6-Row Lines	NA	NA	NA	NA
	Df	Sum Sq	Mean Sq	F value	Pr(>F)
Rep	1	0.0704348	0.0704348	0.0145567	0.904505
Line	22	550.841	25.0382	5.17462	1.56833e-06
Residuals	45	217.74	4.83866	NA	NA
Genetic Variance:	6.73318	NA	NA	NA	NA
Heritability (H2):	0.806749	NA	NA	NA	NA
Trait/Lines:	Tiller Number 7WPE Ppd-H1 Lines	NA	NA	NA	NA
	Df	Sum Sq	Mean Sq	F value	Pr(>F)
Rep	1	4.84588	4.84588	0.31953	0.573963
Line	30	3083.9	102.797	6.77826	1.52846e-10
Residuals	61	925.103	15.1656	NA	NA
Genetic Variance:	29.2103	NA	NA	NA	NA
Heritability (H2):	0.852469	NA	NA	NA	NA
Trait/Lines:	Tiller Number 7WPE ppd-H1 Lines	NA	NA	NA	NA
	Df	Sum Sq	Mean Sq	F value	Pr(>F)
Rep	1	36.2655	36.2655	2.75172	0.100078
Line	53	6142.19	115.89	8.79342	2.12957e-21
Residuals	107	1410.18	13.1792	NA	NA
Genetic Variance:	34.237	NA	NA	NA	NA
Heritability (H2):	0.886279	NA	NA	NA	NA
Trait/Lines:	Tiller Number Maximum All Lines	NA	NA	NA	NA
	Df	Sum Sq	Mean Sq	F value	Pr(>F)
Rep	1	56.5972	56.5972	2.77701	0.101526
Line	26	2932.98	112.807	5.53501	7.0545e-08
Residuals	53	1080.17	20.3806	NA	NA
Genetic Variance:	30.8087	NA	NA	NA	NA
Heritability (H2):	0.819332	NA	NA	NA	NA
Trait/Lines:	Tiller Number Maximum 2-Row Lines	NA	NA	NA	NA
	Df	Sum Sq	Mean Sq	F value	Pr(>F)
Rep	1	0.986852	0.986852	0.169438	0.682272
Line	26	1982.71	76.2581	13.0932	5.23351e-15
Residuals	53	308.686	5.82427	NA	NA
Genetic Variance:	23.4779	NA	NA	NA	NA
Heritability (H2):	0.923624	NA	NA	NA	NA
Trait/Lines:	Tiller Number Maximum 6-Row Lines	NA	NA	NA	NA
	Df	Sum Sq	Mean Sq	F value	Pr(>F)
Rep	1	0.633913	0.633913	0.104762	0.747688
Line	22	1218.11	55.3686	9.15034	2.78218e-10
Residuals	45	272.294	6.05099	NA	NA
Genetic Variance:	16.4392	NA	NA	NA	NA
Heritability (H2):	0.890714	NA	NA	NA	NA
Trait/Lines:	Tiller Number Maximum Ppd-H1 Lines	NA	NA	NA	NA
	Df	Sum Sq	Mean Sq	F value	Pr(>F)
Rep	1	52.7409	52.7409	2.87052	0.0953164
Line	30	3830.68	127.689	6.94972	9.16437e-11
Residuals	61	1120.77	18.3733	NA	NA
Genetic Variance:	36.4387	NA	NA	NA	NA
Heritability (H2):	0.856109	NA	NA	NA	NA
Trait/Lines:	Tiller Number Maximum ppd-H1 Lines	NA	NA	NA	NA
	Df	Sum Sq	Mean Sq	F value	Pr(>F)
Rep	1	16.5936	16.5936	2.30636	0.131795
Line	53	1369.48	25.8393	3.59143	1.00416e-08
Residuals	107	769.835	7.19472	NA	NA
Genetic Variance:	6.21486	NA	NA	NA	NA
Heritability (H2):	0.721559	NA	NA	NA	NA
Trait/Lines:	Tiller Number Productive All Lines	NA	NA	NA	NA
	Df	Sum Sq	Mean Sq	F value	Pr(>F)
Rep	1	48.4504	48.4504	4.30419	0.04289
Line	26	519.282	19.9724	1.77429	0.0386832
Residuals	53	596.599	11.2566	NA	NA
Genetic Variance:	2.90527	NA	NA	NA	NA
Heritability (H2):	0.436393	NA	NA	NA	NA
Trait/Lines:	Tiller Number Productive 2-Row Lines	NA	NA	NA	NA
	Df	Sum Sq	Mean Sq	F value	Pr(>F)
Rep	1	1.43951	1.43951	0.545193	0.463546
Line	26	417.258	16.0484	6.07808	1.48349e-08
Residuals	53	139.94	2.64037	NA	NA
Genetic Variance:	4.46934	NA	NA	NA	NA
Heritability (H2):	0.835474	NA	NA	NA	NA
Trait/Lines:	Tiller Number Productive 6-Row Lines	NA	NA	NA	NA
	Df	Sum Sq	Mean Sq	F value	Pr(>F)
Rep	1	0.130489	0.130489	0.0354213	0.851562
Line	22	364.513	16.5688	4.4976	9.7444e-06
Residuals	45	165.776	3.68392	NA	NA
Genetic Variance:	4.29495	NA	NA	NA	NA
Heritability (H2):	0.777659	NA	NA	NA	NA
Trait/Lines:	Tiller Number Productive Ppd-H1 Lines	NA	NA	NA	NA
	Df	Sum Sq	Mean Sq	F value	Pr(>F)
Rep	1	25.6561	25.6561	2.63089	0.109961
Line	30	956.6	31.8867	3.26979	4.35336e-05
Residuals	61	594.866	9.75189	NA	NA
Genetic Variance:	7.37825	NA	NA	NA	NA
Heritability (H2):	0.69417	NA	NA	NA	NA
Trait/Lines:	Tiller Number Productive ppd-H1 Lines	NA	NA	NA	NA
	Df	Sum Sq	Mean Sq	F value	Pr(>F)
Rep	1	0.554222	0.554222	0.738269	0.392137
Line	53	233.419	4.40413	5.86666	5.0403e-15
Residuals	107	80.3254	0.750705	NA	NA
Genetic Variance:	1.21781	NA	NA	NA	NA
Heritability (H2):	0.829545	NA	NA	NA	NA
Trait/Lines:	Tillering Rate All Lines	NA	NA	NA	NA
	Df	Sum Sq	Mean Sq	F value	Pr(>F)
Rep	1	1.41999	1.41999	1.20443	0.277399
Line	26	124.549	4.79036	4.06318	7.58496e-06
Residuals	53	62.4853	1.17897	NA	NA
Genetic Variance:	1.2038	NA	NA	NA	NA
Heritability (H2):	0.753888	NA	NA	NA	NA
Trait/Lines:	Tillering Rate 2-Row Lines	NA	NA	NA	NA
	Df	Sum Sq	Mean Sq	F value	Pr(>F)
Rep	1	0.0192667	0.0192667	0.0602257	0.807087
Line	26	57.8538	2.22515	6.95558	1.40825e-09
Residuals	53	16.9551	0.319908	NA	NA
Genetic Variance:	0.635079	NA	NA	NA	NA
Heritability (H2):	0.856231	NA	NA	NA	NA
Trait/Lines:	Tillering Rate 6-Row Lines	NA	NA	NA	NA
	Df	Sum Sq	Mean Sq	F value	Pr(>F)
Rep	1	0.0085372	0.0085372	0.0273397	0.869411
Line	22	48.0842	2.18565	6.99934	2.02146e-08
Residuals	45	14.0519	0.312264	NA	NA
Genetic Variance:	0.62446	NA	NA	NA	NA
Heritability (H2):	0.857129	NA	NA	NA	NA
Trait/Lines:	Tillering Rate Ppd-H1 Lines	NA	NA	NA	NA
	Df	Sum Sq	Mean Sq	F value	Pr(>F)
Rep	1	0.815356	0.815356	0.753543	0.388759
Line	30	147.073	4.90243	4.53077	2.87455e-07
Residuals	61	66.0038	1.08203	NA	NA
Genetic Variance:	1.27347	NA	NA	NA	NA
Heritability (H2):	0.779287	NA	NA	NA	NA
Trait/Lines:	Tillering Rate ppd-H1 Lines	NA	NA	NA	NA
	Df	Sum Sq	Mean Sq	F value	Pr(>F)
Rep	1	0.333333	0.333333	1.7541	0.188184
Line	53	17.5864	0.331819	1.74613	0.00762646
Residuals	107	20.3333	0.190031	NA	NA
Genetic Variance:	0.0472627	NA	NA	NA	NA
Heritability (H2):	0.427305	NA	NA	NA	NA
Trait/Lines:	Tillering Duration (Weeks) All Lines	NA	NA	NA	NA
	Df	Sum Sq	Mean Sq	F value	Pr(>F)
Rep	1	0.166667	0.166667	0.963636	0.330732
Line	26	4.22222	0.162393	0.938928	0.557826
Residuals	53	9.16667	0.172956	NA	NA
Genetic Variance:	-0.00352094	NA	NA	NA	NA
Heritability (H2):	-0.0650447	NA	NA	NA	NA
Trait/Lines:	Tillering Duration (Weeks) 2-Row Lines	NA	NA	NA	NA
	Df	Sum Sq	Mean Sq	F value	Pr(>F)
Rep	1	0.166667	0.166667	0.791045	0.377804
Line	26	13.358	0.51377	2.43849	0.00299075
Residuals	53	11.1667	0.210692	NA	NA
Genetic Variance:	0.101026	NA	NA	NA	NA
Heritability (H2):	NA	NA	NA	NA	NA
Trait/Lines:	Tillering Duration (Weeks) 6-Row Lines	NA	NA	NA	NA
	Df	Sum Sq	Mean Sq	F value	Pr(>F)
Rep	1	0.0217391	0.0217391	0.163636	0.687747
Line	22	2.98551	0.135705	1.02149	0.460293
Residuals	45	5.97826	0.13285	NA	NA
Genetic Variance:	0.000951544	NA	NA	NA	NA
Heritability (H2):	0.0210356	NA	NA	NA	NA
Trait/Lines:	Tillering Duration (Weeks) Ppd-H1 Lines	NA	NA	NA	NA
	Df	Sum Sq	Mean Sq	F value	Pr(>F)
Rep	1	0.403226	0.403226	1.72446	0.194038
Line	30	14.2581	0.475269	2.03257	0.00958426
Residuals	61	14.2634	0.233827	NA	NA
Genetic Variance:	0.0804806	NA	NA	NA	NA
Heritability (H2):	0.508011	NA	NA	NA	NA
Trait/Lines:	Tillering Duration (Weeks) ppd-H1 Lines	NA	NA	NA	NA
	Df	Sum Sq	Mean Sq	F value	Pr(>F)
Rep	1	0.173422	0.173422	0.00179242	0.966309
Line	53	35660.5	672.84	6.95422	1.38196e-17
Residuals	107	10352.5	96.7528	NA	NA
Genetic Variance:	192.029	NA	NA	NA	NA
Heritability (H2):	0.856202	NA	NA	NA	NA
Trait/Lines:	Percent Productive Tillers All Lines	NA	NA	NA	NA
	Df	Sum Sq	Mean Sq	F value	Pr(>F)
Rep	1	62.8984	62.8984	0.568309	0.454268
Line	26	15173.4	583.592	5.27295	1.54331e-07
Residuals	53	5865.86	110.677	NA	NA
Genetic Variance:	157.638	NA	NA	NA	NA
Heritability (H2):	0.810353	NA	NA	NA	NA
Trait/Lines:	Percent Productive Tillers 2-Row Lines	NA	NA	NA	NA
	Df	Sum Sq	Mean Sq	F value	Pr(>F)
Rep	1	72.5868	72.5868	0.884111	0.351344
Line	26	20392.8	784.34	9.5533	3.49603e-12
Residuals	53	4351.38	82.1015	NA	NA
Genetic Variance:	234.079	NA	NA	NA	NA
Heritability (H2):	0.895324	NA	NA	NA	NA
Trait/Lines:	Percent Productive Tillers 6-Row Lines	NA	NA	NA	NA
	Df	Sum Sq	Mean Sq	F value	Pr(>F)
Rep	1	1.67443	1.67443	0.0163989	0.898674
Line	22	15911.4	723.247	7.08327	1.68408e-08
Residuals	45	4594.79	102.106	NA	NA
Genetic Variance:	207.047	NA	NA	NA	NA
Heritability (H2):	0.858822	NA	NA	NA	NA
Trait/Lines:	Percent Productive Tillers Ppd-H1 Lines	NA	NA	NA	NA
	Df	Sum Sq	Mean Sq	F value	Pr(>F)
Rep	1	0.319188	0.319188	0.00338267	0.953811
Line	30	16537.4	551.245	5.84195	2.89684e-09
Residuals	61	5755.94	94.3597	NA	NA
Genetic Variance:	152.295	NA	NA	NA	NA
Heritability (H2):	0.828824	NA	NA	NA	NA
Trait/Lines:	Percent Productive Tillers ppd-H1 Lines	NA	NA	NA	NA
	Df	Sum Sq	Mean Sq	F value	Pr(>F)
Rep	1	10.0833	10.0833	5.74146	0.0183046
Line	53	5086.77	95.9768	54.6493	4.84078e-58
Residuals	107	187.917	1.75623	NA	NA
Genetic Variance:	31.4069	NA	NA	NA	NA
Heritability (H2):	0.981702	NA	NA	NA	NA
Trait/Lines:	Days to Heading All Lines	NA	NA	NA	NA
	Df	Sum Sq	Mean Sq	F value	Pr(>F)
Rep	1	4.74074	4.74074	3.62781	0.0622548
Line	26	2368.89	91.1111	69.7219	2.42096e-32
Residuals	53	69.2593	1.30678	NA	NA
Genetic Variance:	29.9348	NA	NA	NA	NA
Heritability (H2):	0.985657	NA	NA	NA	NA
Trait/Lines:	Days to Heading 2-Row Lines	NA	NA	NA	NA
	Df	Sum Sq	Mean Sq	F value	Pr(>F)
Rep	1	5.35185	5.35185	2.39067	0.128012
Line	26	2492.69	95.8727	42.8263	5.02141e-27
Residuals	53	118.648	2.23864	NA	NA
Genetic Variance:	31.2114	NA	NA	NA	NA
Heritability (H2):	0.97665	NA	NA	NA	NA
Trait/Lines:	Days to Heading 6-Row Lines	NA	NA	NA	NA
	Df	Sum Sq	Mean Sq	F value	Pr(>F)
Rep	1	4.8913	4.8913	2.25117	0.140498
Line	22	1092.81	49.6733	22.8616	1.28498e-17
Residuals	45	97.7754	2.17279	NA	NA
Genetic Variance:	15.8335	NA	NA	NA	NA
Heritability (H2):	0.956258	NA	NA	NA	NA
Trait/Lines:	Days to Heading Ppd-H1 Lines	NA	NA	NA	NA
	Df	Sum Sq	Mean Sq	F value	Pr(>F)
Rep	1	5.22581	5.22581	3.53771	0.0647637
Line	30	2759.91	91.9971	62.2792	1.58616e-35
Residuals	61	90.1075	1.47717	NA	NA
Genetic Variance:	30.1733	NA	NA	NA	NA
Heritability (H2):	0.983943	NA	NA	NA	NA
Trait/Lines:	Days to Heading ppd-H1 Lines	NA	NA	NA	NA
	Df	Sum Sq	Mean Sq	F value	Pr(>F)
Rep	1	18.3082	18.3082	1.42899	0.234573
Line	53	30484	575.17	44.893	9.79914e-54
Residuals	107	1370.89	12.812	NA	NA
Genetic Variance:	187.453	NA	NA	NA	NA
Heritability (H2):	0.977725	NA	NA	NA	NA
Trait/Lines:	Seeds Per Spike All Lines	NA	NA	NA	NA
	Df	Sum Sq	Mean Sq	F value	Pr(>F)
Rep	1	8.80074	8.80074	1.76237	0.190019
Line	26	1363.07	52.4257	10.4984	5.25793e-13
Residuals	53	264.666	4.9937	NA	NA
Genetic Variance:	15.8107	NA	NA	NA	NA
Heritability (H2):	0.904747	NA	NA	NA	NA
Trait/Lines:	Seeds Per Spike 2-Row Lines	NA	NA	NA	NA
	Df	Sum Sq	Mean Sq	F value	Pr(>F)
Rep	1	9.5144	9.5144	0.455847	0.502507
Line	26	9579.03	368.424	17.6517	7.32373e-18
Residuals	53	1106.21	20.8719	NA	NA
Genetic Variance:	115.851	NA	NA	NA	NA
Heritability (H2):	0.943348	NA	NA	NA	NA
Trait/Lines:	Seeds Per Spike 6-Row Lines	NA	NA	NA	NA
	Df	Sum Sq	Mean Sq	F value	Pr(>F)
Rep	1	0.633913	0.633913	0.0426472	0.837323
Line	22	14992.3	681.468	45.8464	7.84087e-24
Residuals	45	668.886	14.8641	NA	NA
Genetic Variance:	222.201	NA	NA	NA	NA
Heritability (H2):	0.978188	NA	NA	NA	NA
Trait/Lines:	Seeds Per Spike Ppd-H1 Lines	NA	NA	NA	NA
	Df	Sum Sq	Mean Sq	F value	Pr(>F)
Rep	1	24.6162	24.6162	2.16038	0.146749
Line	30	12409.5	413.649	36.3029	8.35325e-29
Residuals	61	695.058	11.3944	NA	NA
Genetic Variance:	134.085	NA	NA	NA	NA
Heritability (H2):	0.972454	NA	NA	NA	NA
Trait/Lines:	Seeds Per Spike ppd-H1 Lines	NA	NA	NA	NA
	Df	Sum Sq	Mean Sq	F value	Pr(>F)
Rep	1	0.216904	0.216904	12.2166	0.000690483
Line	53	18.4336	0.347804	19.5893	2.60519e-36
Residuals	107	1.89976	0.0177548	NA	NA
Genetic Variance:	0.110016	NA	NA	NA	NA
Heritability (H2):	0.948952	NA	NA	NA	NA
Trait/Lines:	Fifty Kernel Weight (g) All Lines	NA	NA	NA	NA
	Df	Sum Sq	Mean Sq	F value	Pr(>F)
Rep	1	0.137007	0.137007	7.51029	0.00834254
Line	26	4.80528	0.184819	10.1311	1.08086e-12
Residuals	53	0.966859	0.0182426	NA	NA
Genetic Variance:	0.0555253	NA	NA	NA	NA
Heritability (H2):	0.901294	NA	NA	NA	NA
Trait/Lines:	Fifty Kernel Weight (g) 2-Row Lines	NA	NA	NA	NA
	Df	Sum Sq	Mean Sq	F value	Pr(>F)
Rep	1	0.0832296	0.0832296	4.74539	0.033846
Line	26	6.17851	0.237635	13.5489	2.51136e-15
Residuals	53	0.92957	0.0175391	NA	NA
Genetic Variance:	0.0733653	NA	NA	NA	NA
Heritability (H2):	0.926193	NA	NA	NA	NA
Trait/Lines:	Fifty Kernel Weight (g) 6-Row Lines	NA	NA	NA	NA
	Df	Sum Sq	Mean Sq	F value	Pr(>F)
Rep	1	0.0986283	0.0986283	5.6603	0.0216551
Line	22	12.7106	0.577757	33.1576	6.83913e-21
Residuals	45	0.784105	0.0174246	NA	NA
Genetic Variance:	0.186777	NA	NA	NA	NA
Heritability (H2):	0.969841	NA	NA	NA	NA
Trait/Lines:	Fifty Kernel Weight (g) Ppd-H1 Lines	NA	NA	NA	NA
	Df	Sum Sq	Mean Sq	F value	Pr(>F)
Rep	1	0.118453	0.118453	6.47761	0.0134692
Line	30	5.68617	0.189539	10.3649	1.39627e-14
Residuals	61	1.11548	0.0182866	NA	NA
Genetic Variance:	0.0570841	NA	NA	NA	NA
Heritability (H2):	0.903521	NA	NA	NA	NA
Trait/Lines:	Fifty Kernel Weight (g) ppd-H1 Lines	NA	NA	NA	NA
	Df	Sum Sq	Mean Sq	F value	Pr(>F)
Rep	1	77.2105	77.2105	4.40903	0.0381004
Line	53	9416.19	177.664	10.1453	7.29704e-24
Residuals	107	1873.77	17.5119	NA	NA
Genetic Variance:	53.384	NA	NA	NA	NA
Heritability (H2):	0.901432	NA	NA	NA	NA
Trait/Lines:	Plant Height (cm) All Lines	NA	NA	NA	NA
	Df	Sum Sq	Mean Sq	F value	Pr(>F)
Rep	1	51.0093	51.0093	3.80956	0.0562537
Line	26	3148.18	121.084	9.04297	1.02975e-11
Residuals	53	709.661	13.3898	NA	NA
Genetic Variance:	35.898	NA	NA	NA	NA
Heritability (H2):	0.889417	NA	NA	NA	NA
Trait/Lines:	Plant Height (cm) 2-Row Lines	NA	NA	NA	NA
	Df	Sum Sq	Mean Sq	F value	Pr(>F)
Rep	1	27.9264	27.9264	1.27333	0.264225
Line	26	6236.67	239.872	10.9372	2.27738e-13
Residuals	53	1162.39	21.9319	NA	NA
Genetic Variance:	72.6467	NA	NA	NA	NA
Heritability (H2):	0.908569	NA	NA	NA	NA
Trait/Lines:	Plant Height (cm) 6-Row Lines	NA	NA	NA	NA
	Df	Sum Sq	Mean Sq	F value	Pr(>F)
Rep	1	0.76962	0.76962	0.0464365	0.830358
Line	22	4636.74	210.761	12.7167	9.08654e-13
Residuals	45	745.812	16.5736	NA	NA
Genetic Variance:	64.7291	NA	NA	NA	NA
Heritability (H2):	0.921363	NA	NA	NA	NA
Trait/Lines:	Plant Height (cm) Ppd-H1 Lines	NA	NA	NA	NA
	Df	Sum Sq	Mean Sq	F value	Pr(>F)
Rep	1	117.54	117.54	6.5969	0.0126795
Line	30	4394.79	146.493	8.22189	2.59918e-12
Residuals	61	1086.86	17.8174	NA	NA
Genetic Variance:	42.8918	NA	NA	NA	NA
Heritability (H2):	0.878373	NA	NA	NA	NA
Trait/Lines:	Plant Height (cm) ppd-H1 Lines	NA	NA	NA	NA
